# Supplementary material for: Parliaments lead the change for women’s, children’s and adolescents’ health: what have we learnt?
Source: HighWire-hosted journal article supplement (doi:10.1136/bmjgh-2020-003615), 2021-02-01

## Supplemental file 1. Documents retrieved per sources and search strings

| Source/Search Strings                          | Documents retrieved |
|------------------------------------------------|---------------------|
| <b>A. DATABASES</b>                            |                     |
| <b>Pubmed</b>                                  |                     |
| TITLE AND ABSTRACT Parlamentarios AND Salud    | 0                   |
| TITLE AND ABSTRACT Parlamentos AND Salud       | 0                   |
| TITLE AND ABSTRACT Parlamento AND Salud        | 0                   |
| TITLE AND ABSTRACT PARLIAMENTARIANS AND HEALTH | 56                  |
| TITLE AND ABSTRACT PARLIAMENTS AND HEALTH      | 13                  |
| <b>World Bank e-library</b>                    |                     |
| TITLE AND ABSTRACT Parlamentarios AND Salud    | 0                   |
| TITLE AND ABSTRACT Parlamentos AND Salud       | 0                   |
| TITLE AND ABSTRACT Parlamento AND Salud        | 0                   |
| TITLE AND ABSTRACT PARLIAMENTARIANS AND HEALTH | 8                   |
| TITLE AND ABSTRACT PARLIAMENTS AND HEALTH      | 68                  |
| <b>Google Scholar</b>                          |                     |
| TITLE Parlamentarios AND Salud                 | 4                   |
| TITLE Parlamentos AND Salud                    | 1                   |
| TITLE Parlamento AND Salud                     | 8                   |
| TITLE AND ABSTRACT PARLIAMENTARIANS AND HEALTH | 21                  |
| TITLE AND ABSTRACT PARLIAMENTS AND HEALTH      | 180                 |
| <b>J-Stor</b>                                  |                     |
| TITLE AND ABSTRACT Parlamentarios AND Salud    | 0                   |
| TITLE AND ABSTRACT Parlamentos AND Salud       | 0                   |
| TITLE AND ABSTRACT Parlamento AND Salud        | 10                  |
| <i>Documents retrieved from databases</i>      | <b>369</b>          |
| <b>B. OTHER SOURCES</b>                        |                     |
| <b>Grey literature</b>                         |                     |

|                                                                                                                                                                   |            |
|-------------------------------------------------------------------------------------------------------------------------------------------------------------------|------------|
| Purposeful search of WHO, UNICEF, WPL and UNFPA websites using key words: "parliamentarians/parliaments"                                                          | 8          |
| Purposeful search of IPU, EPF, UN Women websites using key word: "health"                                                                                         | 17         |
| Purposeful search of MeasuredHS, WHO, IPU, UNICEF, and UNFPA websites using key words: "parlamentarios" AND "salud" results in Spanish                            | 1          |
| Purposeful search of MeasuredHS, WHO, IPU, UNICEF, and UNFPA websites using key words: "parlamentos" AND "salud" results in Spanish                               | 9          |
| Purposeful search of MeasuredHS, WHO, IPU, UNICEF, and UNFPA websites using key words: "parlamento" AND "salud" results in Spanish                                | 6          |
| <b>PMNCH Endnote Web database</b>                                                                                                                                 |            |
| Purposeful search of the PMNCH Endnote Web Database and retrieved documents not already identified that mentioned "parliamentarians/parliaments" AND "health"     | 26         |
| Purposeful search of the PMNCH Endnote Web Database and retrieved documents not already identified that mentioned "parlamentarios" AND "salud" results in Spanish | 5          |
| Purposeful search of the PMNCH Endnote Web Database and retrieved documents not already identified that mentioned "parlamentos" AND "salud" results in Spanish    | 5          |
| Purposeful search of the PMNCH Endnote Web Database and retrieved documents not already identified that mentioned "parlamento" AND "salud" results in Spanish     | 10         |
| <i>Documents retrieved from other sources</i>                                                                                                                     | <b>87</b>  |
| <b>C. BIBLIOGRAPHIC SEARCHES</b>                                                                                                                                  | <b>12</b>  |
| <b>TOTAL NUMBER OF DOCUMENTS RETRIEVED</b>                                                                                                                        | <b>468</b> |

## Literature Review Flow Chart

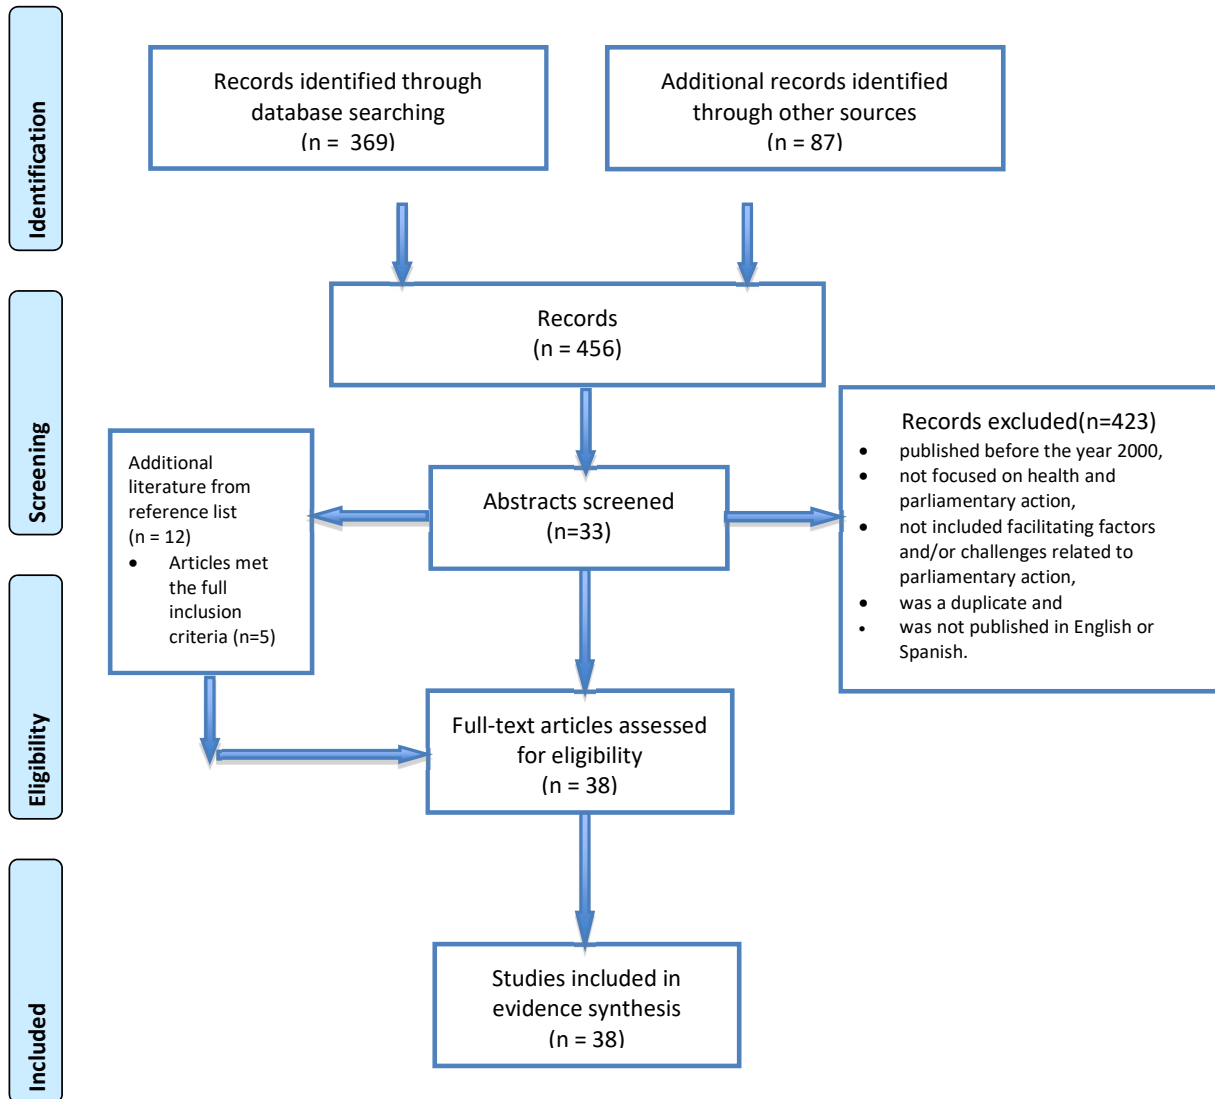

Supplement: bmjgh-2020-003615supp001_data_supplement.pdf [file bmjgh-2020-003615supp001_data_supplement.pdf]
